# Supplementary material
Source: PubMed Central journal article supplement (PMC2768122)
Supplement: NIHMS135287-supplement-01.pdf [file NIHMS135287-supplement-01.pdf]

**Supplemental Figure 1:** Representative HCD-MS/MS spectra of iTRAQ-labeled phosphopeptides identified from pig heart mitochondrial proteins. Insets showed the precursor ion masses of phosphopeptides and iTRAQ ratios representing the change between control mitochondria and mitochondria in response to 0.65  $\mu$ M free calcium. (A). YHGHS\*MSDPGVSYR (PDH E1 $\alpha$  subunit) showed 3.3-fold dephosphorylation at Ser292; (B). YHGHS\*MSDPGVS\*YR (PDH E1 $\alpha$  subunit) demonstrated a total of 4.4-fold dephosphorylation at both Ser292 and Ser299; (C). YGMGTS\*VER (PDH E1 $\alpha$  subunit) showed 2.7-fold dephosphorylation at Ser231; (D). TGTAEVSS\*ILEER from  $\alpha$  subunit of ATP synthase F1 complex (Complex V of ETC) showed no change in phosphorylation.

**Supplemental Figure 2:** (A). HCD-MS/MS spectra of iTRAQ-labeled mitofilin phosphopeptide (KS\*IQSGPLK) identified from pig heart mitochondria with significant dephosphorylation by 6.7-fold upon de-energization; (B). HCD-MS/MS spectra of iTRAQ-labeled AIF phosphopeptide (VLPNAIVQS\*VGVSGGK) showing an increase in phosphorylation by 1.9-fold with calcium.

### Supplemental Figure 1A

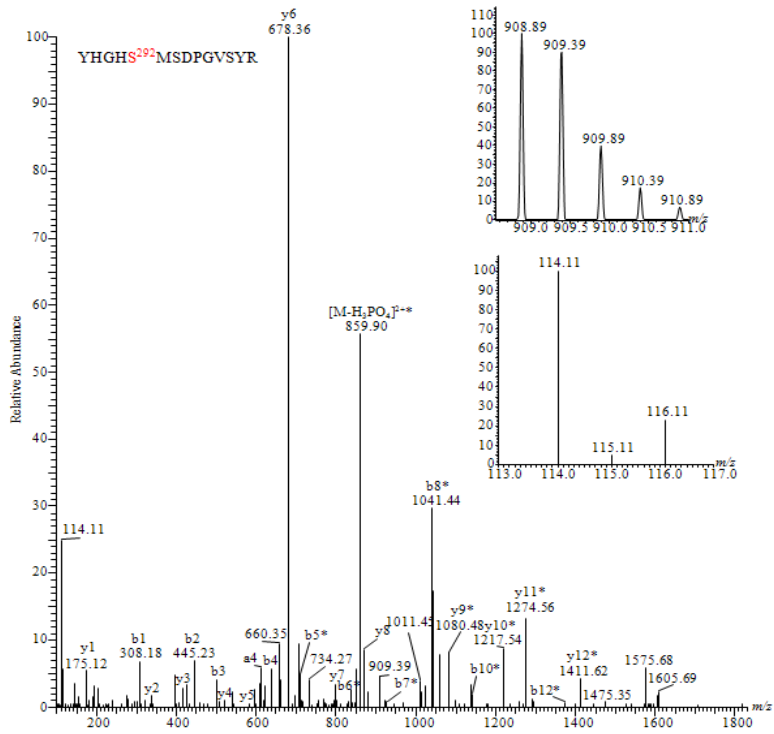

### Supplemental Figure 1B

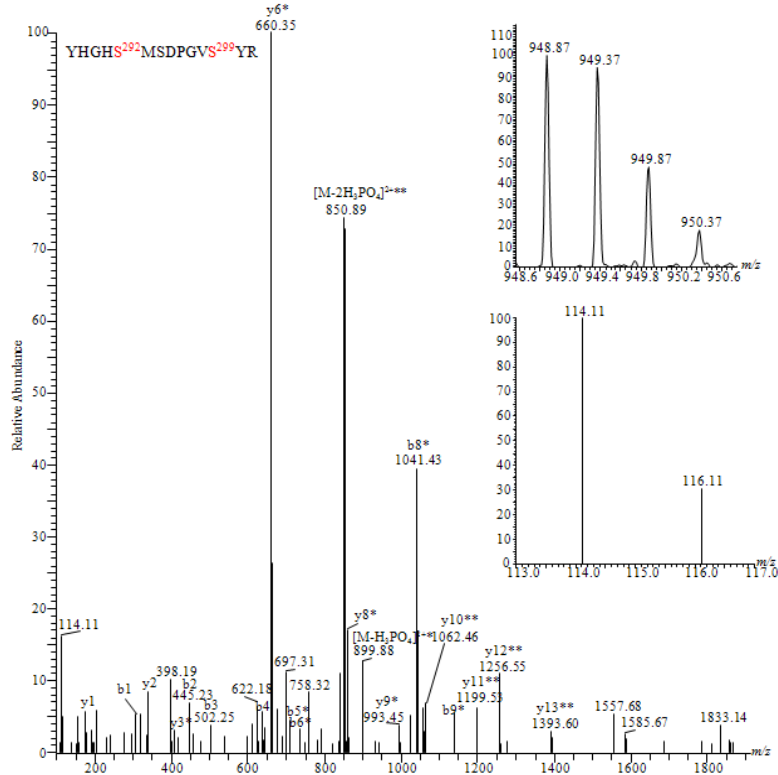

### Supplemental Figure 1C

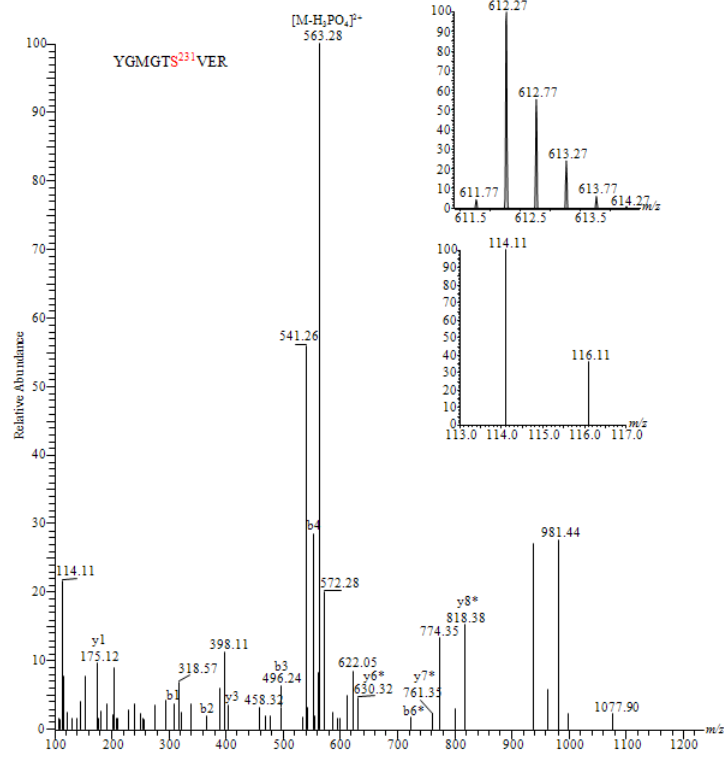

### Supplemental Figure 1D

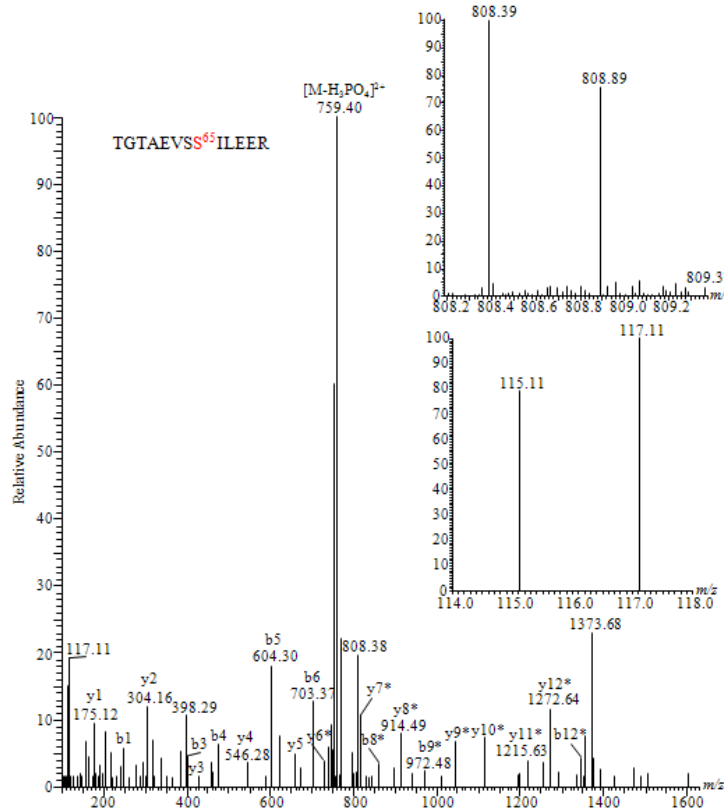

Supplemental Figure 2A

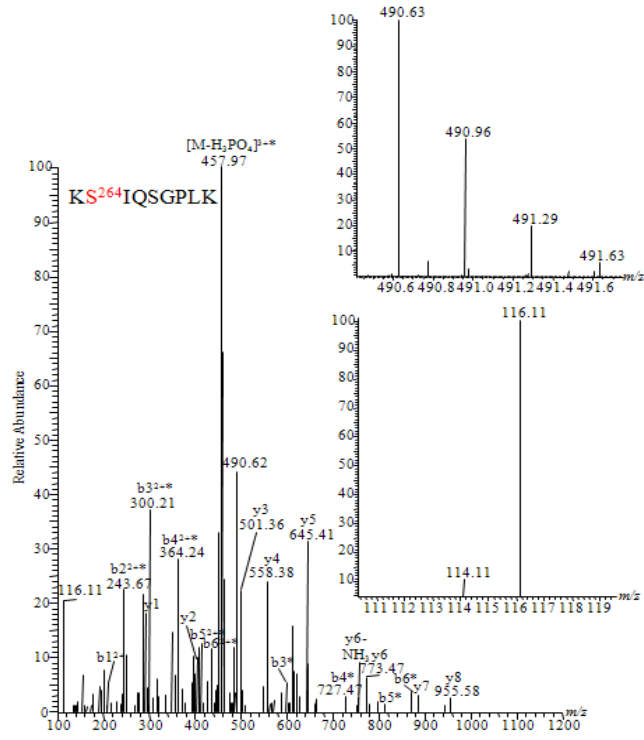

Supplemental Figure 2B

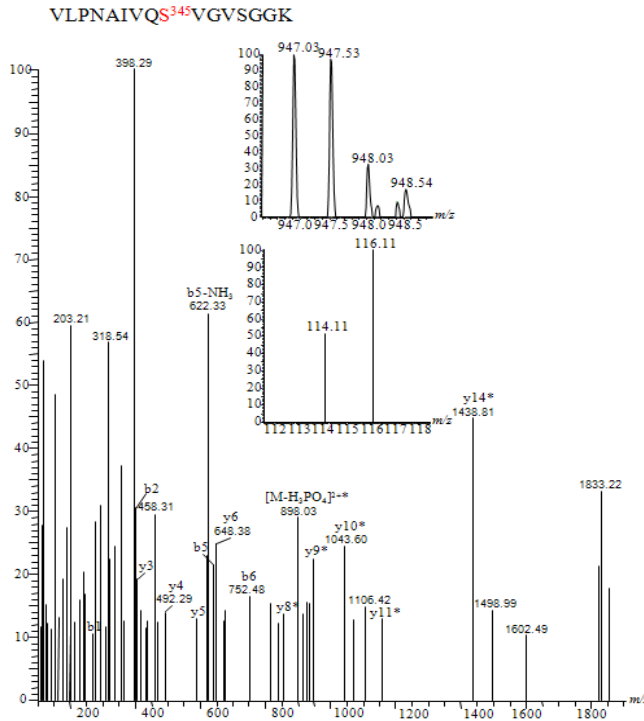

**Supplemental Table I. iTRAQ Analysis of Pig Mitochondrial Phosphoproteome Upon DCA Treatment**

| Protein Description           | Accession#   | Phosphopeptides                          | <i>m/z/z</i> | <sup>a</sup> iTRAQ Ratio (CTL/DCA) | <sup>d</sup> Ion Score/ Expect; <i>p</i> -value |
|-------------------------------|--------------|------------------------------------------|--------------|------------------------------------|-------------------------------------------------|
| ADP/ADT translocator protein  | gi 339920    | DFLAGGVAAAISK                            | 529.95/3     | <sup>c</sup> ND                    | 31/0.072                                        |
|                               |              | YFPTQALNFAFK                             | 907.96/2     | 0.89±0.13                          | 71/0.00011                                      |
|                               |              | YFPTQALNFAFK                             | 907.96/2     | 1.35                               | 64/0.00051                                      |
|                               |              | AAAYFGVYDTAK                             | 787.38/2     | 0.94±0.01                          | 68/0.00035                                      |
|                               |              | <sup>b</sup> Ac-M*TDAAVSFPKDFLAGGVAAAISK | 898.46/3     | <sup>c</sup> ND                    | 36/0.61                                         |
| Mitochondrial creatine kinase | gi 338237    | LGYILTC*PSNLGTGLR                        | 980.00/2     | 1.02±0.13                          | 59/0.0018                                       |
|                               |              | FSKILENLR                                | 744.41/2     | 0.99                               | 24/0.61                                         |
|                               |              | RGTGGVDTAAVADVVDISNIDR                   | 830.40/3     | 0.98                               | 68/0.00038                                      |
| VDAC1                         | gi 47522750  | LTFDSSFSPNTGKK                           | 1021.02/2    | 0.99±0.08                          | 41/0.013                                        |
|                               |              | KLETAVNLAWTAGNSNTR                       | 772.06/3     | 0.94                               | 1e-5                                            |
|                               |              | VNNSSLIGLGYTQTLKPGIK                     | 824.45/3     | 0.95                               | 1e-5                                            |
|                               |              | VTGSLETK                                 | 601.82/2     | 1.02                               | 35/0.021                                        |
| VDAC3                         | gi 6755967   | <sup>b</sup> Ac-C*NTPTYC*DLGK            | 797.82/2     | 0.98                               | 65.00014                                        |
| Malate dehydrogenase          | gi 89574151  | IQEAGTEVVK                               | 721.38/2     | 0.99                               | 48/0.032                                        |
|                               |              | AGAGSATLSMAYAGAR                         | 839.89/2     | 0.91                               | 33/0.036                                        |
| Apoptosis inducing factor 1   | gi 194228272 | VLPDAIVQSVGVSGGK                         | 947.53/2     | 0.95                               | 62/0.00085                                      |
| ATP synthase, OSCP            | gi 57108786  | GEVPC*TVTTASPLDEATLTELK                  | 900.78/3     | 0.77                               | 47/0.031                                        |
| PR domain containing 16       | gi 41349472  | SPPPTLSDPILR                             | 506.29/3     | 1.02                               | 0.04878                                         |

|                                                             |              |                                  |                       |              |              |
|-------------------------------------------------------------|--------------|----------------------------------|-----------------------|--------------|--------------|
| Paired basic amino acid cleaving system 4                   | gi 4505577   | SYC*IVGIAAYNAK                   | 863.95/2              | 0.98         | 1e-5         |
| Predicted: hypothetical protein                             | gi 194037207 | AISAPTSPTR                       | 612.81/2              | °ND          | 1e-5         |
| Predicted: 2,4-dienoyl-CoA reductase                        | gi 194037076 | STEAFPSK                         | 617.80/2              | °ND          | 0.01408      |
| Succinate-CoA ligase, ADP-forming, β subunit                | gi 11321583  | INFDSNSAYR                       | 705.81/2              | °ND          | 1e-5         |
| ATPase type 13A4                                            | gi 66932949  | IGSLEDWLSAK                      | 765.44/2              | 0.98         | 0.032258     |
| SRA stem-loop-interacting RNA-binding protein               | gi 148233424 | ALQGDQTSDEEKDF<br>ALQGDQTSDEEKDF | 975.93/2<br>1015.91/2 | 0.95<br>1.09 | 1e-5<br>1e-5 |
| Similar to ubiquinol-cytochrome c reductase binding protein | gi 194037026 | <sup>b</sup> Ac-ASRPAVAASSK      | 655.83/2              | 1.02         | 45/0.22      |

**Supplemental Table II. iTRAQ Analysis of Pig Mitochondrial Phosphoproteome Upon Calcium Activation**

| Protein Description                                | Accession#   | Phosphopeptides                                        | <i>m/z/z</i> | <sup>a</sup> iTRAQ Ratio (CTL/Ca <sup>2+</sup> ) | <sup>d</sup> Ion Score/ Expect; <i>p</i> -value; XCorr |
|----------------------------------------------------|--------------|--------------------------------------------------------|--------------|--------------------------------------------------|--------------------------------------------------------|
| ADP/ADT translocator protein                       | gi 339920    | AA <sup>b</sup> YFGV <sup>b</sup> YDTAK                | 787.38/2     | 1.12±0.16                                        | 77/4.3e-5                                              |
|                                                    |              | <sup>b</sup> Ac-M*TDAAV <sup>b</sup> SFPKDFLAGGVAAAISK | 898.46/3     | <sup>c</sup> ND                                  | 41/0.019                                               |
|                                                    |              | DFLAGGVAAAISK                                          | 794.42/2     | <sup>c</sup> ND                                  | 44/0.08                                                |
|                                                    |              | YFPTQALNFAFK                                           | 907.96/2     | 0.93±0.16                                        | 51/0.0094                                              |
| Mitochondrial creatine kinase                      | gi 338237    | LGYILTC*PSNLGTGLR                                      | 980.00/2     | 0.92±0.08                                        | 66/0.00036                                             |
|                                                    |              | GTGGVDTA <sup>b</sup> AVADV <sup>b</sup> DISNIDR       | 1167.55/2    | <sup>c</sup> ND                                  | 1e-5                                                   |
|                                                    |              | FSKILENLR                                              | 496.62/3     | <sup>c</sup> ND                                  | 20/0.34                                                |
| Branched chain alpha ketoacid dehydrogenase kinase | gi 2583173   | STSATDTHHVEMAR                                         | 883.88/2     | 1.03                                             | 88/1e-6                                                |
| Malate dehydrogenase                               | gi 89574151  | AGAGSATLSMAYAGAR                                       | 839.89/2     | 0.98                                             | 82/4.7e-6                                              |
|                                                    |              | DVF <sup>b</sup> TK                                    | 489.26/2     | 0.68                                             | 20/0/069                                               |
| VDAC1                                              | gi 47522750  | LTFDSSFS <sup>b</sup> PNTGK                            | 884.92/2     | 1.04±0.29                                        | 40/0.19                                                |
|                                                    |              | DVF <sup>b</sup> TKGYGFGLIK                            | 979.02/2     | 1.28                                             | 2.65                                                   |
|                                                    |              | VNNSSLIGVGYTQTLRPGVK                                   | 824.45/3     | 1.02                                             | 25/0.013                                               |
| Succinyl-CoA synthetase, β subunit                 | gi 3766197   | INFDSNSAYR                                             | 705.81/2     | 1.19                                             | 44/0.018                                               |
| Hydroxysteroid (17-beta) dehydrogenase 10          | gi 4758504   | LVGQGASAVLLDLPNSGGEAQAK                                | 855.47/3     | <sup>c</sup> ND                                  | 1e-5                                                   |
| Similar to nebulin                                 | gi 194043732 | GYDLRPDAISK                                            | 573.00/3     | 1.05                                             | 0.047                                                  |

|                                                        |              |                   |          |      |          |
|--------------------------------------------------------|--------------|-------------------|----------|------|----------|
| Predicted: 2,4-dienoyl-CoA reductase                   | gi 194037076 | STEAFPSK          | 617.80/2 | °ND  | 1e-5     |
| Phospholamban                                          | gi 47523502  | RASTIEMPQAR       | 806.40/2 | 0.83 | 0.049363 |
| ATP synthase, F1 $\alpha$ subunit                      | gi 187370717 | VLSIGDGIAR        | 612.83/2 | 0.67 | 21/0.43  |
| Cytochrome Bc1 complex, chain B                        | gi 3891849   | GGLGLSGAK         | 564.31/2 | 0.67 | 24/0.41  |
| Aspartate aminotransferase                             | gi 223046    | IASTILTSPDLR      | 755.91/2 | 0.67 | 24/0.29  |
| ATP synthase, $\gamma$ subunit                         | gi 543875    | THSDQFLVTFK       | 564.29/3 | 1.16 | 29/0.13  |
| Prohibitin                                             | gi 4505773   | KLEAAEDIA YQLSR   | 659.01/3 | °ND  | 20/0.11  |
| Cytochrome c oxidase, subunit Vb                       | gi 55926217  | LVSHQLAH          | 564.79/2 | 0.83 | 30/0.41  |
| NADH dehydrogenase (ubiquinone) 1 alpha subcomplex, 13 | gi 119605232 | TLQILRENLEEEAIIMK | 804.44/3 | 0.97 | 27/0.29  |



|                                                         |             |           |          |      |         |
|---------------------------------------------------------|-------------|-----------|----------|------|---------|
| Ubiquinol-cytochrome c reductase complex 11 kDa protein | gi 73977070 | LFNSLK    | 545.31/2 | 0.86 | 21/0.91 |
| 2-oxoglutarate/malate carrier protein (OGCP)            | gi 57086345 | LGIYTVLFR | 717.89/2 | 0.71 | 24/2.7  |

**Supplemental Table III. iTRAQ Analysis of Pig Phosphoproteome of De-energized Versus Energized Mitochondria**

| Protein Description                                | Accession#  | Phosphopeptides                         | <i>m/z/z</i> | <sup>3</sup> iTRAQ Ratio (D/E) | <sup>4</sup> Ion Score/Expect |
|----------------------------------------------------|-------------|-----------------------------------------|--------------|--------------------------------|-------------------------------|
| ADP/ADT translocator protein                       | gi 339920   | AAYFGVYDTAK                             | 787.38/2     | 1.20                           | 46/0.021                      |
|                                                    |             | AA <sup>Y</sup> FGVYDTAK                | 787.38/2     | 1.10                           | 44/0.039                      |
|                                                    |             | YFPTQALNFAFK                            | 907.96/2     | 1.01±0.05                      | 53/0.0054                     |
| Mitochondrial creatine kinase                      | gi 338237   | LGYILTC*PSNLGTGLR                       | 979.99/2     | 1.40±0.13                      | 53/0.0056                     |
|                                                    |             | FSKILENLR                               | 744.41/2     | 1.04±0.01                      | 25/0.27                       |
|                                                    |             | GTGGVDTAAVADV <sup>Y</sup> DISNIDR      | 799.75/3     | 1.01                           | 23/0.61                       |
| Branched chain alpha ketoacid dehydrogenase kinase | gi 2583173  | STSATDTHHVEMAR                          | 589.59/3     | 1.07±0.05                      | 41/0.05                       |
| Malate dehydrogenase                               | gi 89574151 | AGAGSATLSMAYAGAR                        | 839.89/2     | 1.01±0.04                      | 72/4.7e-05                    |
| VDAC1                                              | gi 47522750 | LTFDSSFSPNTGK                           | 681.02/3     | 1.24±0.04                      | 35/0.28                       |
|                                                    |             | VNNSSLIGVGYTQTLRPGVK                    | 824.46/3     | 1.13                           | 50/0.0053                     |
| Succinyl-CoA synthetase, β subunit                 | gi 3766197  | INFDSNSAYR                              | 705.81/2     | 0.89±0.26                      | 31/0.31                       |
| Apoptosis inducing factor                          | gi 4406579  | SLSAIDR                                 | 493.24/2     | 0.75                           | 25/0.11                       |
| 2-oxoglutarate carrier                             | gi 11693170 | FLFGGLAGM*GATV <sup>F</sup> VQPLDLVC*NR | 565.29/5     | 0.99                           | 12/0.72                       |

|                                            |              |                     |           |      |            |
|--------------------------------------------|--------------|---------------------|-----------|------|------------|
| Cytochrome c oxidase subunit Vb            | gi 55926217  | LVSHQLAH            | 376.87/3  | 1.33 | 17/0.15    |
| Heat shock protein 27kDa                   | gi 50916342  | QLSSGVSEIQQTADR     | 614.97/3  | °ND  | 43/0.054   |
| Electron transfer flavoprotein             | gi 26344475  | HHPSIQPTLEGWK       | 949.49/2  | 1.01 | 15/0.31    |
| Cardiac alpha tropomyosin                  | gi 148222268 | AISEELDHALNDM*TSI   | 999.96/2  | 1.08 | 50/0.0098  |
| Catenin, alpha 3                           | gi 223942084 | TPEELEDVSDLEEDHEVR  | 789.02/3  | °ND  | 75/3.3e-05 |
| B-cell receptor associated protein 37      | gi 1666876   | ISSPTGSKDLQM*VNISLR | 1205.61/2 | 0.85 | 14/0.68    |
| Progesterone receptor membrane component 1 | gi 5729875   | EGEPTVYSDEEHPKDESAR | 888.73/3  | °ND  | 61/0.00085 |
